# Supplementary material
Source: PubMed Central journal article supplement (PMC7823159)
Supplement: develop-148-190868-s1.pdf [file develop-148-190868-s1.pdf]

Fig. S1 Kim and O'Connor

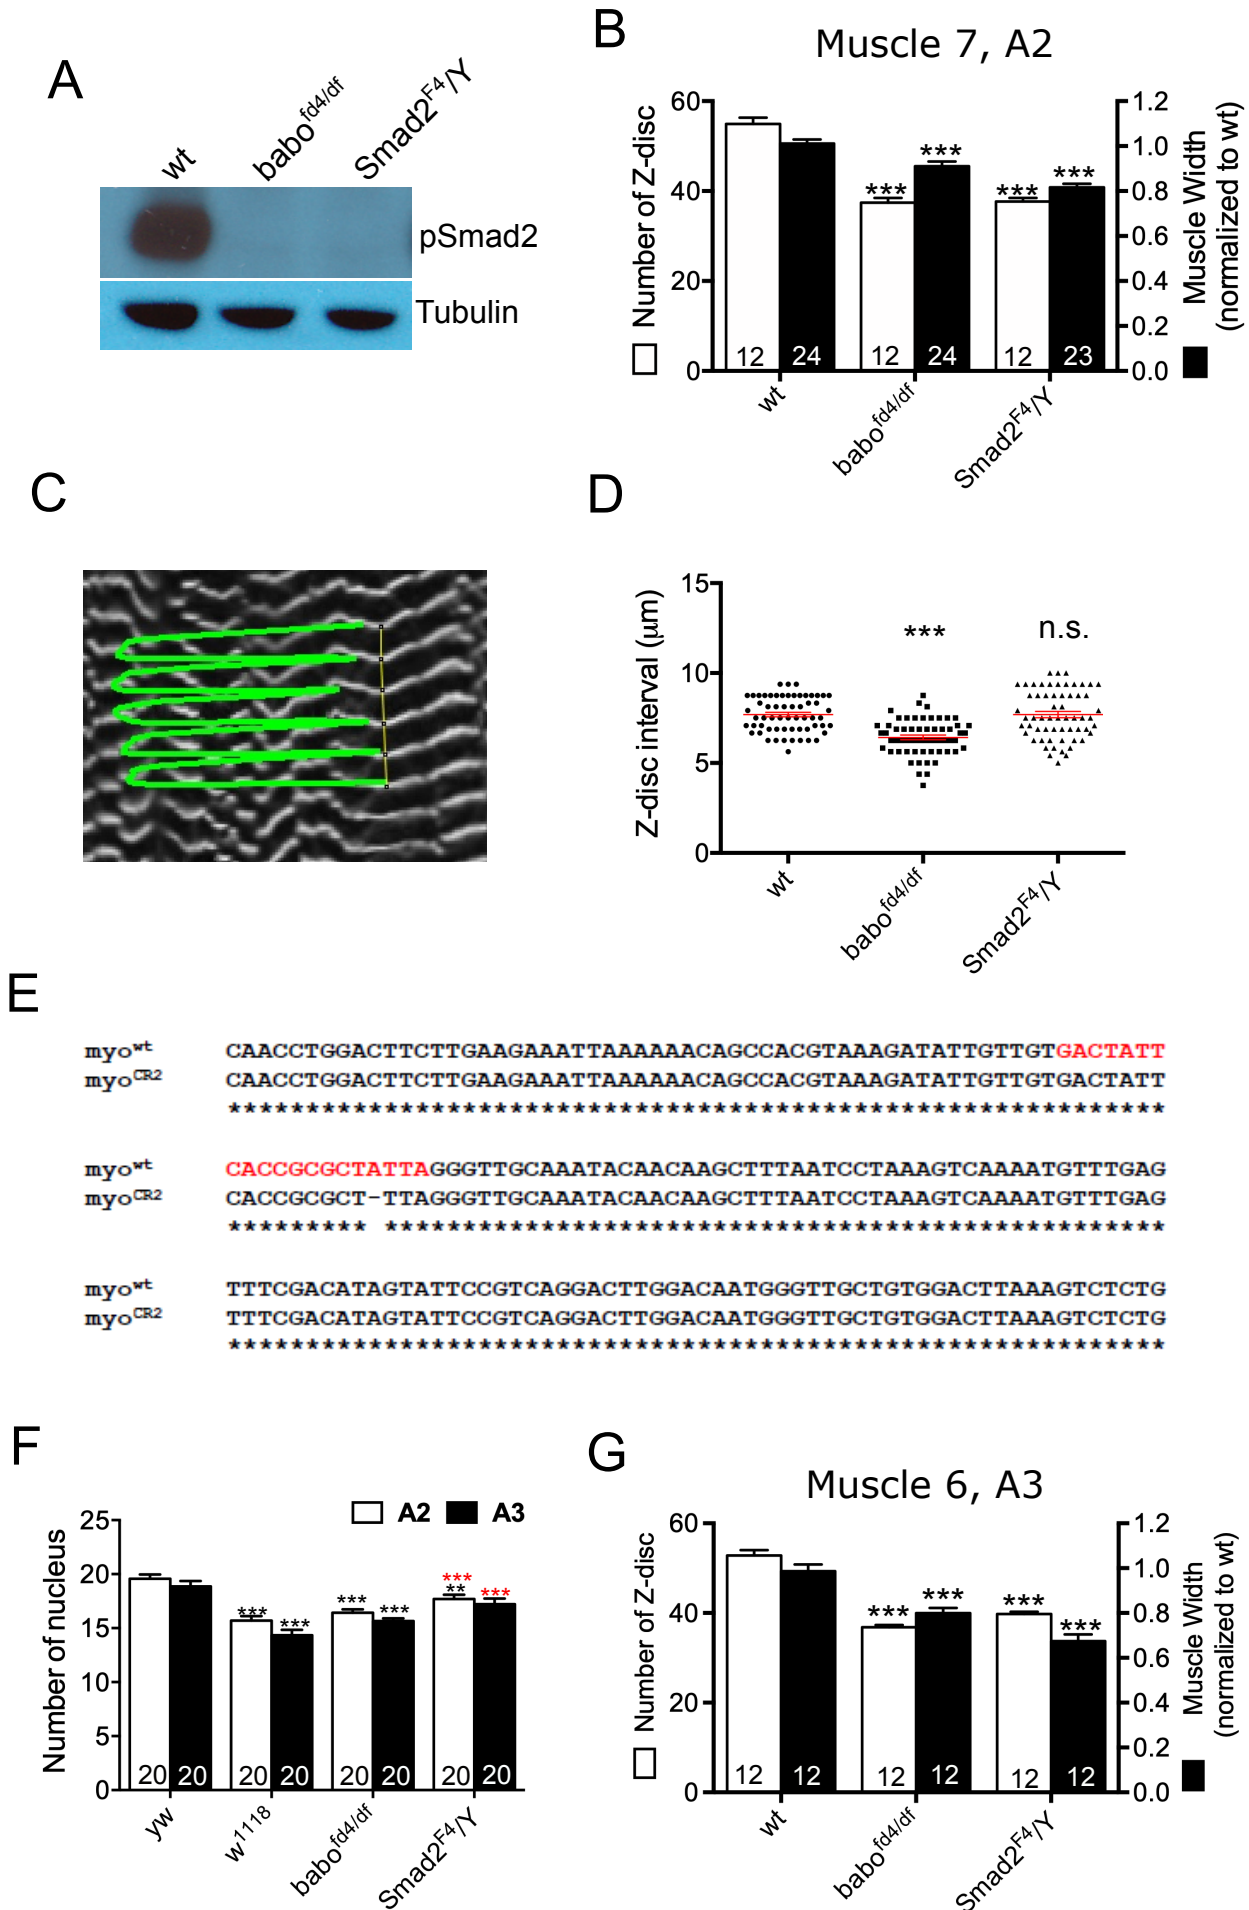

## Supplementary Figures

**Fig. S1.** (A) The specificity of the anti-pSmad2 antibody was examined by immunoblot analysis. The absence of corresponding bands of pSmad2 in *babo* and *Smad2* mutants verifies the specificity of the antibody. The absence of pSmad2 band in *babo* mutants also indicated that Smad2 phosphorylation is exclusively canonical in larval body wall tissue. (B) As in muscle 6, both the Z-disc number and muscle width are decreased in muscle 7 of *babo* and *Smad2* mutants. (C) A representative image showing how the Z-discs are detected and intervals are measured from  $\alpha$ -Actn staining by PeakFinder macro of ImageJ software. (D) Sarcomere size assessed by Z-disc interval is decreased in *babo* but not in *Smad2* mutant. (E) Sequence alignment of *myo<sup>CR2</sup>* mutant line with wild-type. *myo<sup>CR2</sup>* has a lesion with one base pair deletion in the target sequence. (F) Number of nucleus from muscle 6 of abdominal segment 2 and 3. The *babo* mutant shows a similar number of nucleus as *w<sup>1118</sup>* which we used as a wild type in this study, whereas *Smad2* mutant exhibits an increased nucleus number compared to *w<sup>1118</sup>* (red asterisks). When compared to *yw*, all genotypes including *w<sup>1118</sup>* are found to have a smaller number of nucleus (black asterisks) except in the abdominal segment 3 of *Smad2* mutant. (G) Z-disc number and relative width of the muscle 6 of abdominal segment 3. As in segment 2, both the Z-disc number and muscle width are decreased in *babo* and *Smad2* mutants. Values are mean  $\pm$  SEM. \*\* $p < 0.01$  and \*\*\* $p < 0.001$  from one-way ANOVA followed by Dunnett's test in which each genotype was compared to *wt*.

Fig. S2 Kim and O'Connor

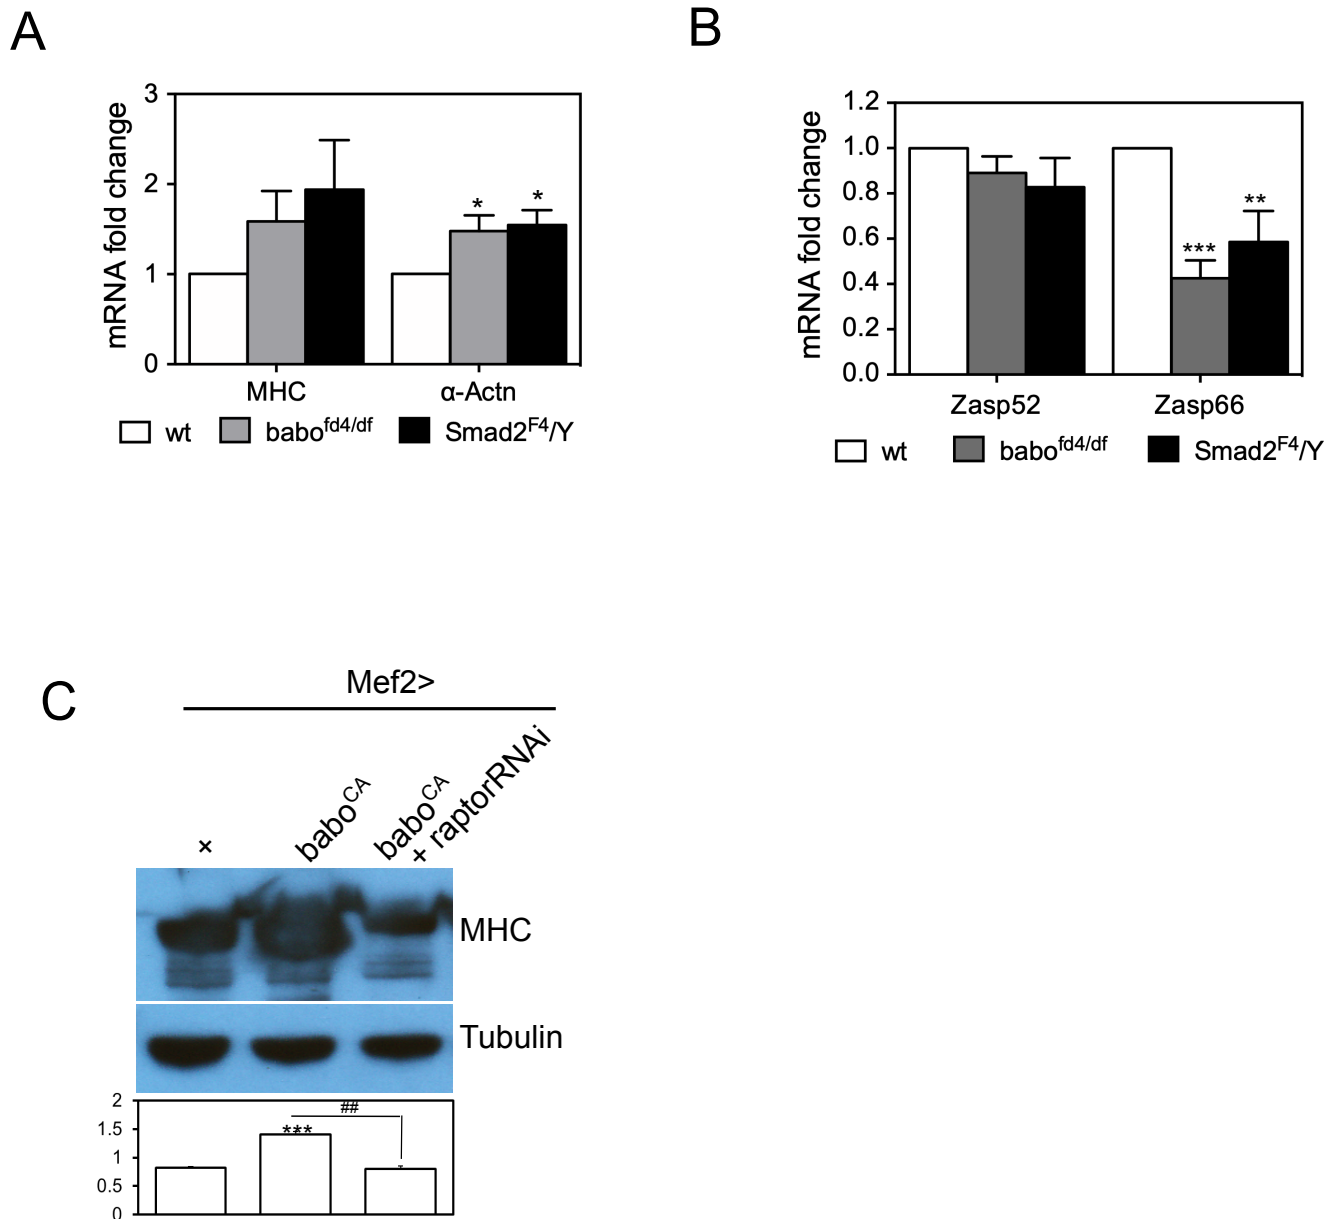

**Fig. S2.** (A) Quantification of transcripts level of sarcomeric proteins in *wt* as well as in *babo* and *Smad2* mutants by qPCR. Transcription of *Mhc* is not significantly altered while *Actn* expression is up-regulated by *babo* and *Smad2* mutations. (B) Quantification of transcripts level of Zasps in *wt* as well as in *babo* and *Smad2* mutants by qPCR. Transcription of *Zasp52* is not significantly altered while *Zasp66* expression is down-regulated in *babo* and *Smad2* mutants. (C) Representative immunoblot image and quantification of MHC. Co-expressed *raptor*<sup>RNAi</sup> suppressed the hyper production of MHC caused by *babo*<sup>CA</sup>. Values are mean SEM. \**p*<0.05, \*\**p*<0.01 and \*\*\**p*<0.001 from one-way ANOVA followed by Dunnett's test in which each genotype was compared to *wt* (A,B), *Mef2-Gal4/+* control (C). Additionally, an unpaired *t*-test was performed in C as indicated by lines. ##*p*<0.01 from unpaired *t*-test.

Fig. S3 Kim and O'Connor

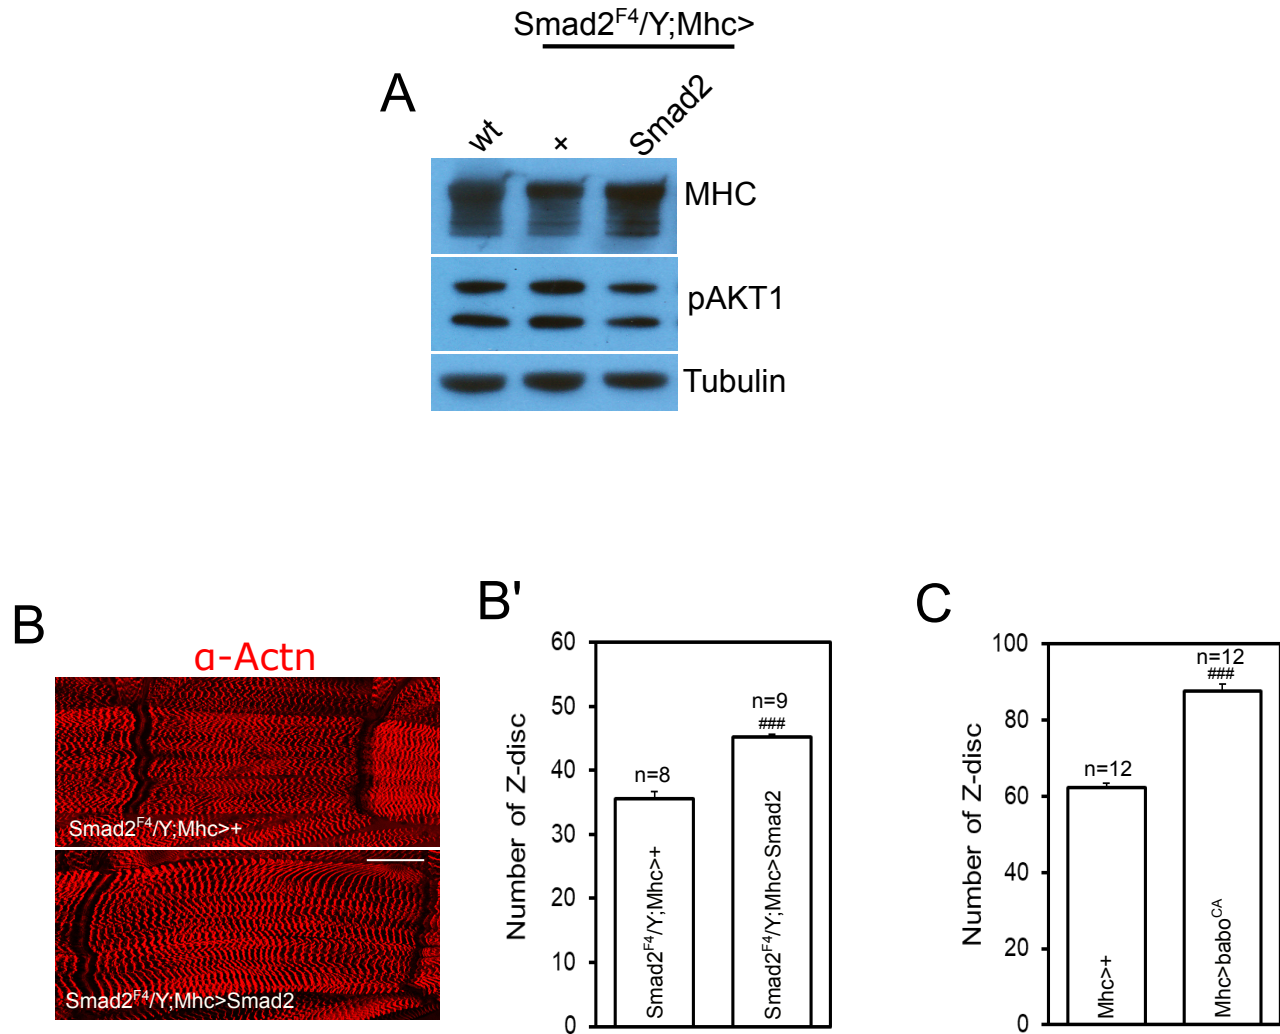

**Fig. S3. Reproduction of the key results using *Mhc-Gal4* driver.** (A) Representative immunoblot images of MHC and pAKT1. Overexpression of *Smad2* transgene using *Mhc-Gal4* driver in *Smad2* mutant background restores the altered levels of MHC and pAKT1. (B) Representative muscle images stained with Actn antibody. Overexpressing *Smad2* transgene using *Mhc-Gal4* driver rescues the reduced size of *Smad2* muscle. Scale bar equals 50  $\mu$ m. (B') Quantification of muscle size by counting Z-discs. *Mhc-Gal4*-driven expression of *Smad2* transgene rescues the decreased Z-disc number of *Smad2* muscle. (C) Overexpressing *babo*<sup>CA</sup> using *Mhc-Gal4* driver greatly increases the Z-disc number. Values are mean  $\pm$  SEM. ###p<0.001 from unpaired *t*-test.

Fig. S4 Kim and O'Connor

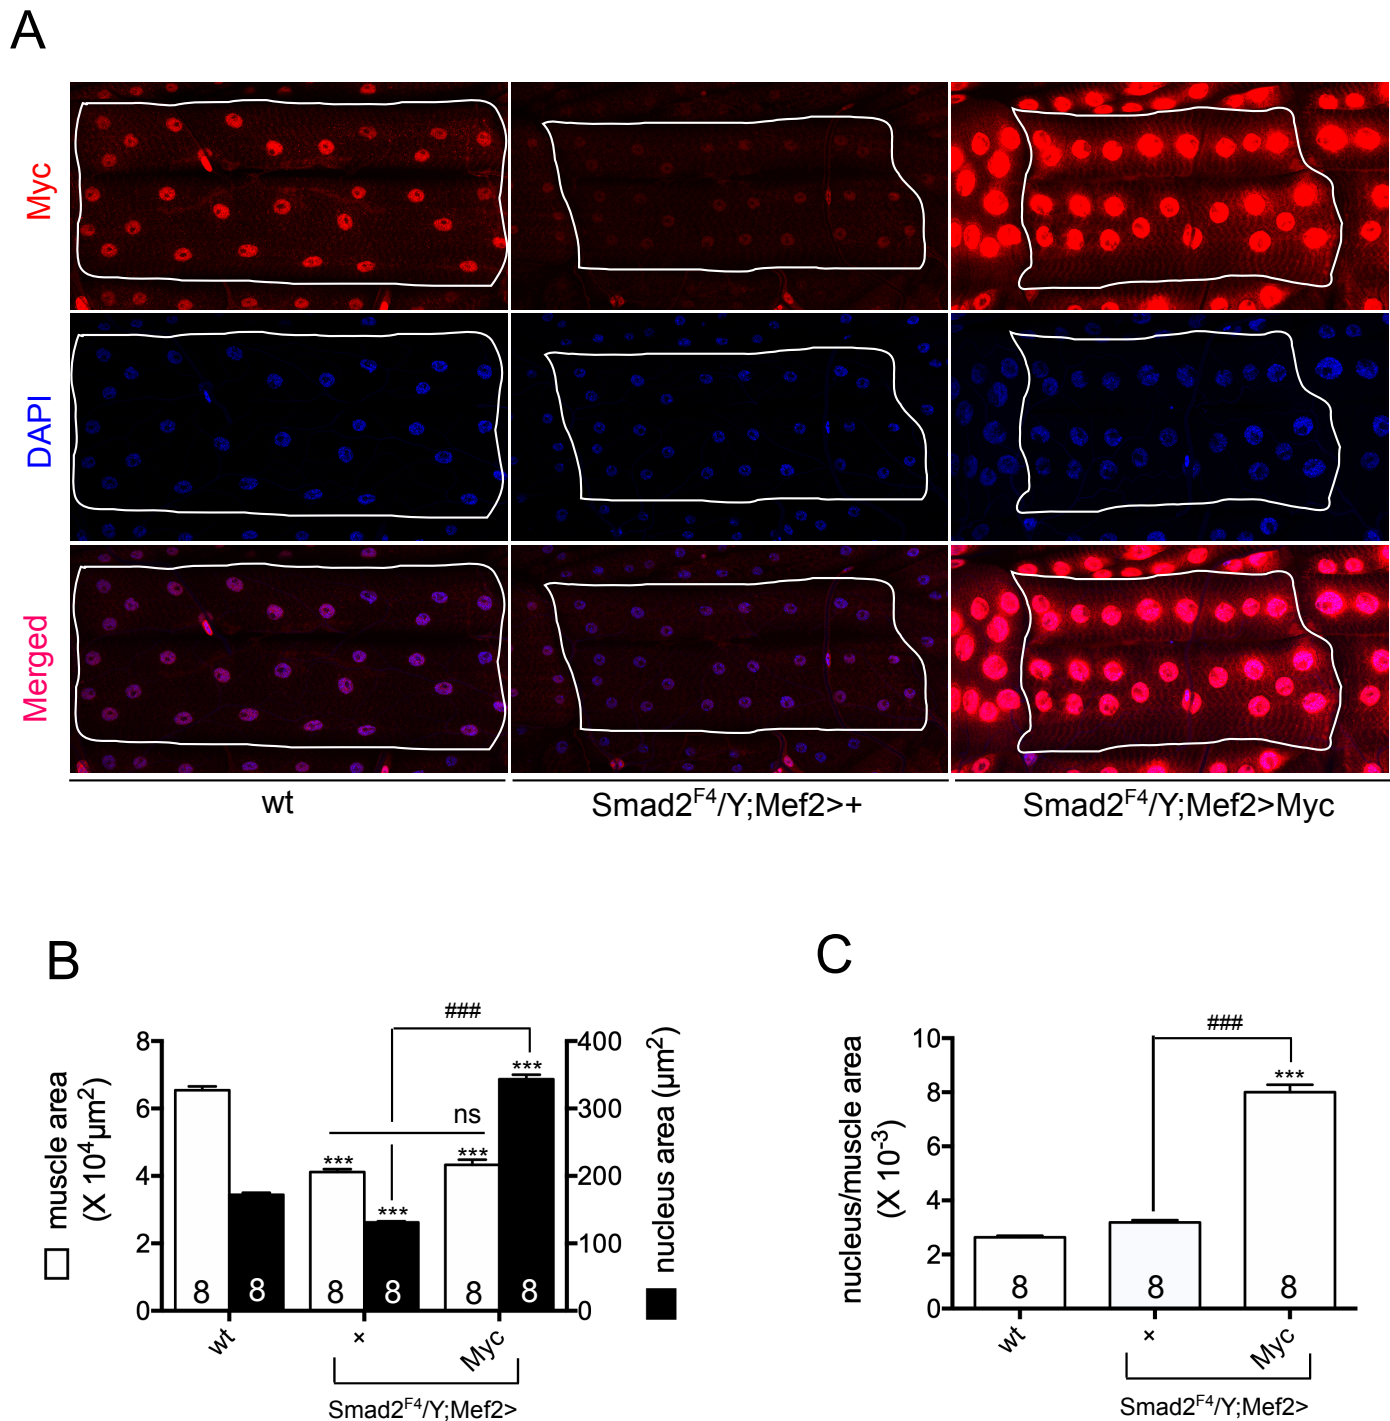

**Fig. S4. Decoupling between myonuclei and muscle sizes.** (A) Representative images of Myc and DAPI staining on *wt*, *Smad2<sup>F4</sup>/Y;Mef2<sup>></sup>* and *Smad2<sup>F4</sup>/Y;Mef2<sup>></sup>Myc* muscles. Muscular expression of *Myc* increased the myonuclei size but failed to rescue the size of *Smad2* muscle. (B) Quantification of muscle and myonuclei sizes. (C) The ratio of average myonuclei size to muscle surface area is not altered in *Smad2* muscle while it is greatly increased by *Myc* overexpression. Values are mean  $\pm$  SEM. \*\*\* $p < 0.001$  from one-way ANOVA followed by Dunnett's test in which each genotype was compared to *wt*. Additionally, unpaired t-tests were performed in as indicated by lines. ns: not significant, ### $p < 0.01$  from unpaired *t*-test.
